# Supplementary material for: Stable isomeric layered indium coordination polymers for high proton conduction
Source: Royal Society of Chemistry journal article supplement (doi:10.1039/d1ce01107c), 2021-11-19
Supplement: d1ce01107c1.pdf [file d1ce01107c1.pdf]

*Electronic Supplementary Information (ESI)*

**Stable isomeric layered indium coordination polymers for high proton conduction**

Xiuli Guo,<sup>a</sup> Zhenhua Li,<sup>a</sup> Xiaobo Chen,<sup>b</sup> Dadong Liang,<sup>a</sup> Chunguang Li,<sup>a</sup> Guanghua Li,<sup>a</sup> Li Wang,<sup>\*c</sup> Zhan Shi<sup>\*a</sup> and Shouhua Feng<sup>a</sup>

<sup>a</sup> State Key Laboratory of Inorganic Synthesis and Preparative Chemistry, College of Chemistry, Jilin University, Changchun 130012, P. R. China. E-mail: zshi@mail.jlu.edu.cn.

<sup>b</sup> School of Engineering, RMIT University, Carlton, VIC 3053, Australia.

<sup>c</sup> College of Chemistry, Jilin University, Changchun 130012, Jilin, P. R. China.

**Table of contents**

---

|                                                                                                                                                                        |     |
|------------------------------------------------------------------------------------------------------------------------------------------------------------------------|-----|
| Fig. S1 (a) View of the coordination environment of In <sup>3+</sup> ion in In-L-NO <sub>3</sub> . (b) The coordination mode of the L <sup>2-</sup> ligands in In-CPs. | S2  |
| Fig. S2 The schematic diagram of continuous hydrogen bonding network in In-Cl.                                                                                         | S3  |
| Fig. S3 SEM images of In-CPs and their corresponding crystal cross sections.                                                                                           | S4  |
| Fig. S4 IR spectra of the prepared In-CPs.                                                                                                                             | S5  |
| Fig. S5 The PXRD patterns for In-L-Cl after soaking in various solvents for ten days.                                                                                  | S6  |
| Fig. S6 TGA curves of In-CPs.                                                                                                                                          | S7  |
| Fig. S7 Water vapor adsorption in In-L-Cl and In-L-NO <sub>3</sub> .                                                                                                   | S8  |
| Table S1 Crystal data and structure refinements for the prepared In-CPs.                                                                                               | S9  |
| Table S2 Selected bond lengths [Å] and angles [°] for In-L-Cl.                                                                                                         | S10 |
| Table S3 Selected bond lengths [Å] and angles [°] for In-L-NO <sub>3</sub> .                                                                                           | S11 |
| Table S4 Hydrogen bonds for In-L-Cl.                                                                                                                                   | S12 |
| Table S5 Hydrogen bonds for In-L-NO <sub>3</sub> .                                                                                                                     | S13 |
| Table S6 Proton conductivities (S cm <sup>-1</sup> ) of In-L-Cl and In-L-NO <sub>3</sub> at different RHs under room temperature.                                      | S14 |
| Table S7 Proton conductivities (S cm <sup>-1</sup> ) of In-L-Cl and In-L-NO <sub>3</sub> under H <sub>2</sub> O atmosphere.                                            | S15 |
| Table S8 The comparison of proton conductivities of the prepared In-CPs and the reported related crystalline materials                                                 | S16 |
| REFERENCES                                                                                                                                                             | S17 |

---

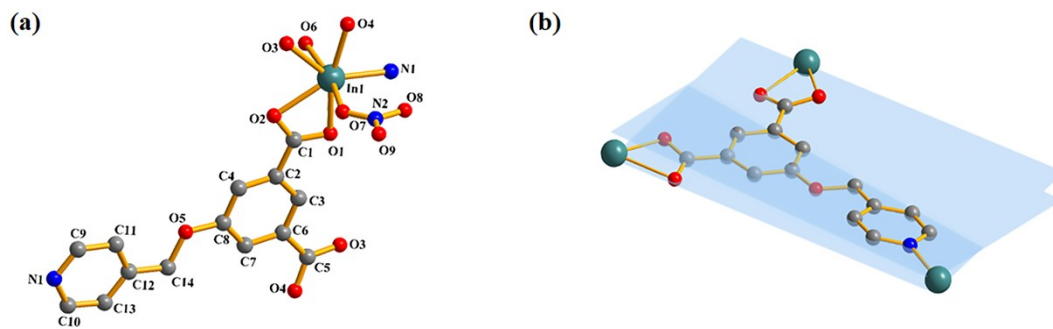

**Fig. S1** (a) View of the coordination environment of  $\text{In}^{3+}$  ion in  $\text{In-L-NO}_3$ . (b) The coordination mode of the  $\text{L}^{2-}$  ligands in  $\text{In-CPs}$ .

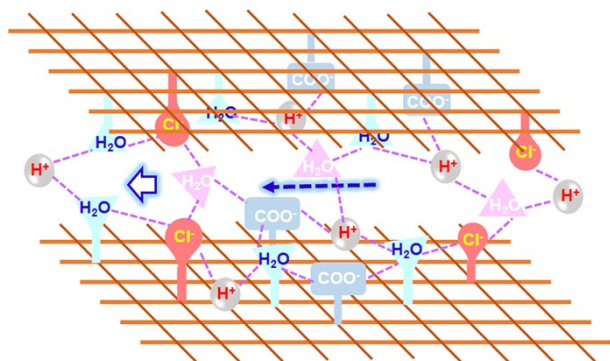

Fig. S2 The schematic diagram of continuous hydrogen bonding network in In-Cl.

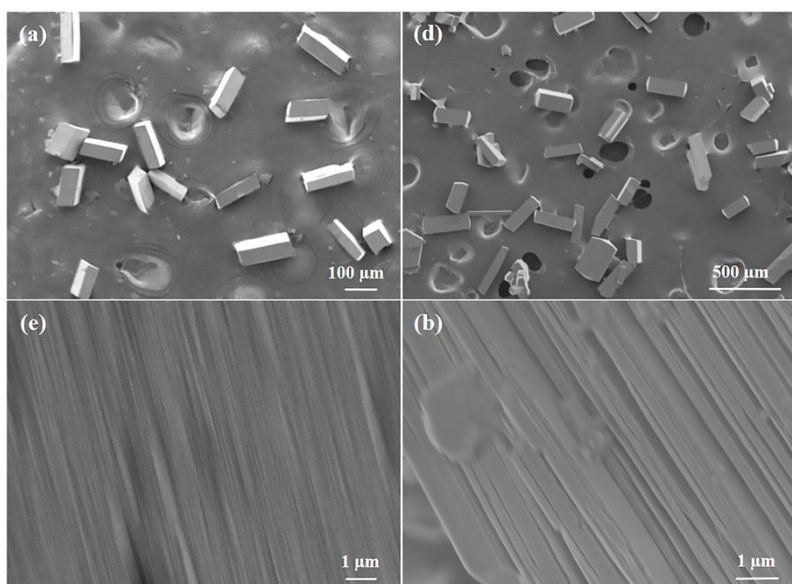

**Fig. S3** SEM images of In-L-Cl (a, c) and In-L-NO<sub>3</sub> (b, d) and their corresponding crystal cross-sections.

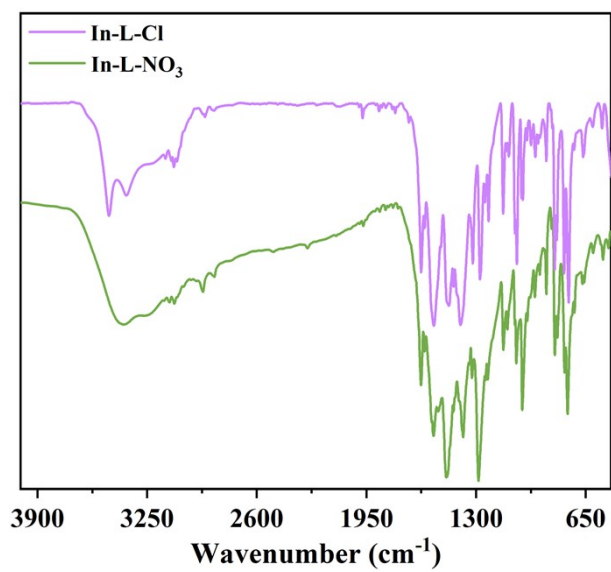

**Fig. S4** IR spectra of the prepared In-CPs.

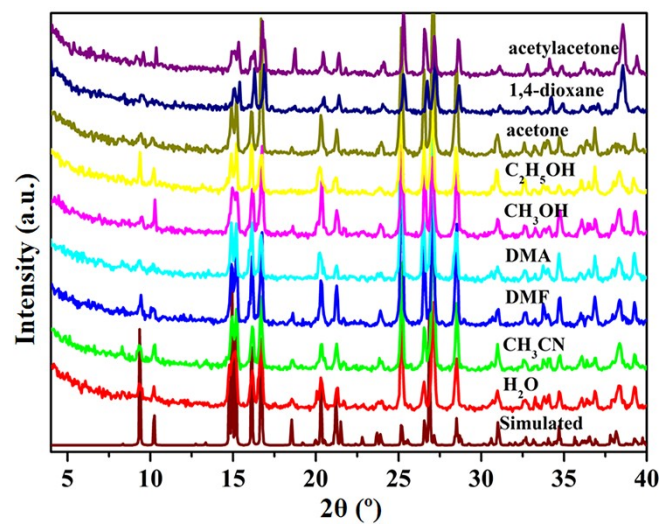

**Fig. S5** The PXRD patterns for In-L-Cl after soaking in various solvents for ten days.

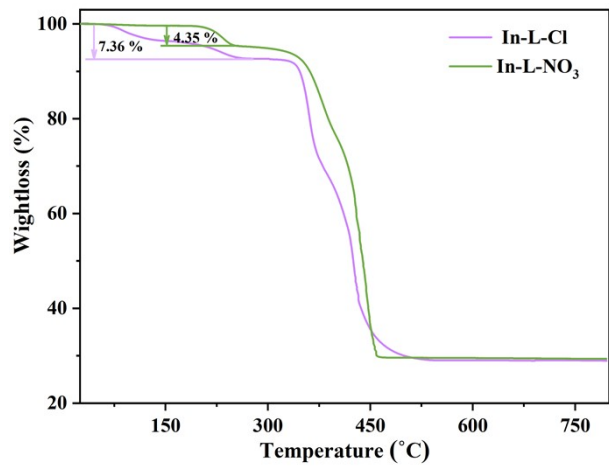

Fig. S6 TGA curves of In-CPs.

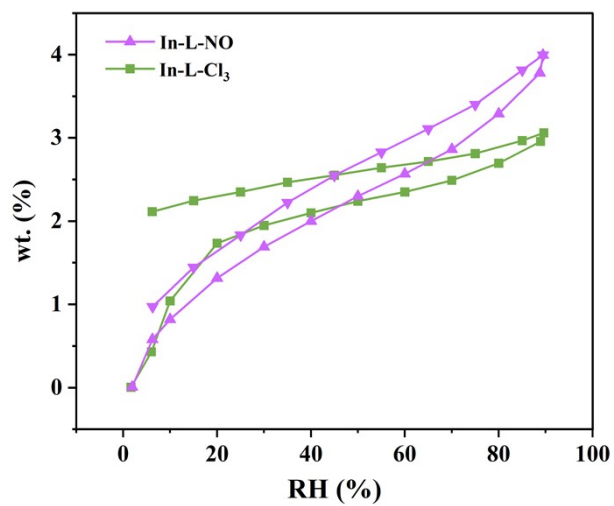

Fig. S7 Water-vapor adsorption/desorption isotherms of In-L-NO<sub>3</sub> and In-L-Cl.



**Table S1** Crystallographic data and structure refinement for the prepared In-CPs.

| Compounds                                           | In-L-Cl                                                         | In-L-NO <sub>3</sub>                                             |
|-----------------------------------------------------|-----------------------------------------------------------------|------------------------------------------------------------------|
| Empirical formula                                   | C <sub>14</sub> H <sub>13</sub> ClNO <sub>7</sub> In            | C <sub>14</sub> H <sub>11</sub> N <sub>2</sub> O <sub>9</sub> In |
| Formula weight                                      | 457.52                                                          | 466.07                                                           |
| Temperature (K)                                     | 199(2)                                                          | 293(2)                                                           |
| Wavelength (Å)                                      | 0.71073                                                         | 0.71073                                                          |
| Crystal system                                      | Monoclinic                                                      | Monoclinic                                                       |
| Space group                                         | C 2/c                                                           | C 2/c                                                            |
| <i>a</i> (Å)                                        | 19.824(0)                                                       | 19.849(4)                                                        |
| <i>b</i> (Å)                                        | 13.440(4)                                                       | 13.421(3)                                                        |
| <i>c</i> (Å)                                        | 13.623(8)                                                       | 13.601(3)                                                        |
| $\beta$ (°)                                         | 119.29(1)                                                       | 119.38(3)                                                        |
| Volume (Å <sup>3</sup> )                            | 3165.9(2)                                                       | 3157.2(14)                                                       |
| <i>Z</i>                                            | 8                                                               | 8                                                                |
| Calculated density (Mg·m <sup>-3</sup> )            | 1.920                                                           | 1.961                                                            |
| $\mu$ (mm <sup>-1</sup> )                           | 1.699                                                           | 1.553                                                            |
| <i>F</i> (000)                                      | 1808                                                            | 1840                                                             |
| $\theta$ range for data collection (°)              | 4.314 - 28.363                                                  | 2.355 - 25.190                                                   |
| Limiting indices                                    | -20 ≤ <i>h</i> ≤ 26, -17 ≤ <i>k</i> ≤ 14, -18 ≤ <i>l</i> ≤ 18   | -23 ≤ <i>h</i> ≤ 23, -16 ≤ <i>k</i> ≤ 14, -16 ≤ <i>l</i> ≤ 16    |
| Reflections collected / unique                      | 10135 / 3781                                                    | 11578 / 2821                                                     |
|                                                     | <i>R</i> <sub>int</sub> = 0.0136                                | <i>R</i> <sub>int</sub> = 0.0553                                 |
| Refinement method                                   | Full-matrix least-squares on <i>F</i> <sup>2</sup>              | Full-matrix least-squares on <i>F</i> <sup>2</sup>               |
| Data / restraints / parameters                      | 3781 / 0 / 269                                                  | 2826 / 18 / 227                                                  |
| Goodness-of-fit on <i>F</i> <sup>2</sup>            | 1.090                                                           | 1.192                                                            |
| Final <i>R</i> indices [ <i>I</i> > 2σ( <i>I</i> )] | <i>R</i> <sub>1</sub> = 0.0205, <i>wR</i> <sub>2</sub> = 0.0485 | <i>R</i> <sub>1</sub> = 0.0709 <i>wR</i> <sub>2</sub> = 0.1605   |
| <i>R</i> indices (all data)                         | <i>R</i> <sub>1</sub> = 0.0208, <i>wR</i> <sub>2</sub> = 0.0487 | <i>R</i> <sub>1</sub> = 0.0799, <i>wR</i> <sub>2</sub> = 0.1648  |
| Largest diff. peak and hole (eÅ <sup>-3</sup> )     | 0.498 and -0.490                                                | 2.072 and -1.374                                                 |
| CCDC No.                                            | 2077713                                                         | 2077712                                                          |

**Table S2** Selected bond lengths [Å] and angles [°] for In-L-Cl.

| In-L-Cl             |            |                     |            |
|---------------------|------------|---------------------|------------|
| In(1)-O(5)#1        | 2.1860(13) | In(1)-O(6)          | 2.1964(14) |
| In(1)-O(3)#2        | 2.2342(13) | In(1)-N(1)          | 2.2970(15) |
| In(1)-O(2)#2        | 2.3339(13) | In(1)-O(4)#1        | 2.4090(14) |
| In(1)-Cl(1)         | 2.4335(5)  | O(5)#1-In(1)-O(6)   | 86.57(6)   |
| O(2)-In(1)#3        | 2.3339(13) | O(3)-In(1)#3        | 2.2342(13) |
| O(4)-In(1)#4        | 2.4089(13) | O(5)-In(1)#4        | 2.1859(13) |
| O(5)#1-In(1)-O(6)   | 86.59(6)   | O(5)#1-In(1)-O(3)#2 | 164.80(5)  |
| O(6)-In(1)-O(3)#2   | 92.54(6)   | O(5)#1-In(1)-N(1)   | 82.18(5)   |
| O(6)-In(1)-N(1)     | 89.65(6)   | O(3)#2-In(1)-N(1)   | 82.64(5)   |
| O(5)#1-In(1)-O(4)#1 | 56.48(5)   | O(6)-In(1)-O(4)#1   | 81.98(5)   |
| O(3)#2-In(1)-O(4)#1 | 138.43(5)  | N(1)-In(1)-O(4)#1   | 138.08(5)  |
| O(2)#2-In(1)-O(4)#1 | 81.27(4)   | O(5)#1-In(1)-Cl(1)  | 90.39(4)   |
| O(4)#1-In(1)-Cl(1)  | 86.75(4)   | O(3)#2-In(1)-Cl(1)  | 89.62(6)   |
| N(1)-In(1)-Cl(1)    | 101.36(4)  | O(2)#2-In(1)-Cl(1)  | 93.33(4)   |
| O(6)-In(1)-Cl(1)    | 168.09(4)  |                     |            |

Symmetry transformations used to generate equivalent atoms:

# 1  $x, y-1, z$     #2  $x+1/2, -y+3/2, z+1/2$     #3  $x-1/2, -y+3/2, z-1/2$     #4  $x, y+1, z$

**Table S3** Selected bond lengths [Å] and angles [°] for In-L-NO<sub>3</sub>.

| In-L-NO <sub>3</sub> |           |                     |          |
|----------------------|-----------|---------------------|----------|
| In(1)-O(7)           | 2.171(10) | In(1)-O(5)#1        | 2.179(7) |
| In(1)-O(3)#2         | 2.205(6)  | In(1)-O(6)          | 2.212(8) |
| In(1)-N(1)           | 2.254(7)  | In(1)-O(2)#2        | 2.317(6) |
| In(1)-O(4)#1         | 2.327(7)  | O(3)-In(1)#3        | 2.318(6) |
| O(4)-In(1)#3         | 2.201(6)  | O(4)-In(1)#4        | 2.327(7) |
| O(6)-In(1)-C(8)#1    | 87.9(3)   | N(1)-In(1)-C(8)#1   | 110.9(3) |
| O(5)#1-In(1)-C(8)#1  | 28.9(3)   | O(3)#2-In(1)-C(8)#1 | 164.2(3) |
| O(2)#2-In(1)-O(4)#1  | 78.4(2)   | O(7)-In(1)-C(8)#1   | 88.4(4)  |
| O(6)-In(1)-O(4)#1    | 83.1(3)   | N(1)-In(1)-O(4)#1   | 138.4(3) |
| O(5)#1-In(1)-O(4)#1  | 57.5(2)   | O(3)#2-In(1)-O(4)#1 | 135.8(2) |
| N(1)-In(1)-O(2)#2    | 141.1(3)  | O(7)-In(1)-O(4)#1   | 87.9(4)  |
| O(3)#2-In(1)-O(2)#2  | 57.4(2)   | O(6)-In(1)-O(2)#2   | 84.5(3)  |
| O(7)-In(1)-O(2)#2    | 84.9(3)   | O(5)#1-In(1)-O(2)#2 | 135.6(2) |
| O(3)#2-In(1)-N(1)    | 84.8(3)   | O(6)-In(1)-N(1)     | 88.1(3)  |
| O(7)-In(1)-N(1)      | 104.7(4)  | O(5)#1-In(1)-N(1)   | 82.8(3)  |
| O(5)#1-In(1)-O(6)    | 93.5(3)   | O(3)#2-In(1)-O(6)   | 91.8(3)  |
| O(5)#1-In(1)-O(3)#2  | 166.4(3)  | O(7)-In(1)-O(6)     | 167.2(3) |
| O(7)-In(1)-O(3)#2    | 88.5(4)   | O(7)-In(1)-O(5)#1   | 89.2(4)  |

Symmetry transformations used to generate equivalent atoms:

#1  $x+1/2, -y+3/2, z+1/2$     #2  $x, y+1, z$     #3  $x-1/2, -y+3/2, z-1/2$     #4  $x, y-1, z$

**Table S4** Hydrogen bonds for In-L-Cl.

| In-L-Cl               |            |              |              |            |
|-----------------------|------------|--------------|--------------|------------|
| D-H...A               | d(D-H) (Å) | d(H...A) (Å) | d(D...A) (Å) | <(DHA) (°) |
| O(6)-H(6B)···O(2)#7   | 0.87       | 1.96         | 2.818(2)     | 167.6      |
| O(1W)-H(1WB)···O(4)#5 | 0.87       | 1.92         | 2.703(2)     | 149.7      |
| O(1W)-H(1A)···Cl(1)#5 | 0.86       | 2.25         | 3.104(2)     | 168.0      |
| O(6)-H(6A)···O(1W)#6  | 0.87       | 1.70         | 2.553(2)     | 167.0      |

Symmetry transformations used to generate equivalent atoms:

#1  $x+1/2, -y+3/2, z+1/2$  #2  $x, y-1, z$  #3  $x-1/2, -y+3/2, z-1/2$  #4  $x, y+1, z$  #5  $-x+1, y-1, -z+1/2$   
#6  $x-1/2, -y+1/2, z+1/2$   $-x, y-1, -z+1/2$

**Table S5** Hydrogen bonds for In-L-NO<sub>3</sub>.

| In-L-NO <sub>3</sub> |            |              |              |            |
|----------------------|------------|--------------|--------------|------------|
| D-H...A              | d(D-H) (Å) | d(H...A) (Å) | d(D...A) (Å) | <(DHA) (°) |
| C(13)-H(13)...O(7)#5 | 0.93       | 2.62         | 3.422(14)    | 144.2      |
| O(6)-H(6A)...O(2)#7  | 0.85       | 1.95         | 2.796(10)    | 171.0      |
| O(6)-H(6B)...O(8)#6  | 0.85       | 2.13         | 2.855(18)    | 142.7      |

Symmetry transformations used to generate equivalent atoms:

|    |                   |    |                        |    |                        |    |             |
|----|-------------------|----|------------------------|----|------------------------|----|-------------|
| #1 | $x, y-1, z$       | #2 | $x+1/2, -y+3/2, z+1/2$ | #3 | $x-1/2, -y+3/2, z-1/2$ | #4 | $x, y+1, z$ |
| #5 | $x-1/2, y+1/2, z$ | #6 | $-x, y, -z+1/2$        | #7 | $-x, y-1, -z+1/2$      |    |             |

**Table S6** Proton conductivities ( $S\text{ cm}^{-1}$ ) of In-L-Cl and In-L-NO<sub>3</sub> at different RHs under room temperature.

| RHs (%) | In-L-Cl               | In-L-NO <sub>3</sub>  |
|---------|-----------------------|-----------------------|
| 11      | $4.75 \times 10^{-6}$ | $3.70 \times 10^{-6}$ |
| 33      | $1.54 \times 10^{-5}$ | $1.18 \times 10^{-5}$ |
| 43      | $1.86 \times 10^{-5}$ | $1.71 \times 10^{-5}$ |
| 53      | $4.01 \times 10^{-5}$ | $3.62 \times 10^{-5}$ |
| 69      | $6.05 \times 10^{-5}$ | $5.43 \times 10^{-5}$ |
| 75      | $1.27 \times 10^{-4}$ | $6.14 \times 10^{-5}$ |
| 85      | $2.33 \times 10^{-4}$ | $1.92 \times 10^{-4}$ |
| 100     | $3.69 \times 10^{-4}$ | $2.86 \times 10^{-4}$ |

**Table S7** Proton conductivities ( $S\text{ cm}^{-1}$ ) of In-L-Cl and In-L-NO<sub>3</sub> under H<sub>2</sub>O atmosphere.

| temp (K) | In-L-Cl               | In-L-NO <sub>3</sub>  |
|----------|-----------------------|-----------------------|
| 298      | $4.78 \times 10^{-4}$ | $2.00 \times 10^{-4}$ |
| 303      | $6.19 \times 10^{-4}$ | $2.82 \times 10^{-4}$ |
| 313      | $8.50 \times 10^{-4}$ | $3.65 \times 10^{-4}$ |
| 323      | $1.10 \times 10^{-3}$ | $4.59 \times 10^{-4}$ |
| 333      | $1.32 \times 10^{-3}$ | $5.83 \times 10^{-4}$ |
| 343      | $1.61 \times 10^{-3}$ | $7.26 \times 10^{-4}$ |
| 353      | $1.88 \times 10^{-3}$ | $1.00 \times 10^{-3}$ |

**Table S8** The comparison of proton conductivities of the the prepared In-CPs and the reported related crystalline materials

| Compounds                                                                                                                                            | Measurement conditions | $\sigma$ (S cm <sup>-1</sup> ) | Ref.      |
|------------------------------------------------------------------------------------------------------------------------------------------------------|------------------------|--------------------------------|-----------|
| In-L-NO <sub>3</sub>                                                                                                                                 | 80 °C, 100 % RH        | $1.0 \times 10^{-3}$           | This work |
| In-L-Cl                                                                                                                                              | 80 °C, 100% RH         | $1.88 \times 10^{-3}$          | This work |
| [Triethylpropylammonium][PbI <sub>3</sub> ]                                                                                                          | 200 °C, 0% RH          | $4.47 \times 10^{-5}$          | S1        |
| [H <sub>3</sub> O][[(VO <sub>2</sub> ) <sub>3</sub> (SeO <sub>3</sub> ) <sub>2</sub> ]                                                               | 90 °C, 95% RH          | $5.95 \times 10^{-5}$          | S2        |
| {NBu <sub>3</sub> (CH <sub>2</sub> COOH)}[MnCr(ox) <sub>3</sub> ]                                                                                    | 25 °C, 90% RH          | $1.8 \times 10^{-3}$           | S3        |
| {NBu <sub>2</sub> (CH <sub>2</sub> COOH) <sub>2</sub> }[MnCr(ox) <sub>3</sub> ]                                                                      | 25 °C, 90% RH          | $5.2 \times 10^{-7}$           | S3        |
| [CH <sub>3</sub> NH <sub>3</sub> ] <sub>2</sub> [H <sub>3</sub> O]Ag <sub>5</sub> Sn <sub>4</sub> Se <sub>12</sub> ·C <sub>2</sub> H <sub>5</sub> OH | 60 °C, 99% RH          | $2.62 \times 10^{-4}$          | S4        |
| Zn <sub>3</sub> (IBT) <sub>2</sub> (H <sub>2</sub> O) <sub>2</sub>                                                                                   | 30 °C, 97% RH          | $1.98 \times 10^{-5}$          | S5        |
| Zn <sub>3</sub> (bpdC) <sub>2</sub> (pdc)(DMF) · 6DMF                                                                                                | 60 °C, 97% RH          | $9.5 \times 10^{-3}$           | S6        |
| [Me <sub>2</sub> NH <sub>2</sub> ][Eu(ox) <sub>2</sub> (H <sub>2</sub> O)]·3H <sub>2</sub> O                                                         | 55°C, 95%              | $2.7 \times 10^{-3}$           | S7        |
| {[HOOC(CH <sub>2</sub> ) <sub>2</sub> OC]Fcc[CO(CH <sub>2</sub> ) <sub>2</sub> COOH]}                                                                | 100 °C, 98% RH         | $1.14 \times 10^{-2}$          | S8        |
| [(HOOC)Fcc(COOH)]                                                                                                                                    | 100 °C, 98% RH         | $1.99 \times 10^{-5}$          | S8        |
| [Cr(μ <sub>3</sub> -O)(H <sub>2</sub> O) <sub>3</sub> (NDC(SO <sub>3</sub> H <sub>5/6</sub> ) <sub>2</sub> ) <sub>3</sub> ]                          | 80 °C, 100% RH         | $1.27 \times 10^{-1}$          | S9        |
| In-BQ                                                                                                                                                | 30 °C, 95%             | $2.10 \times 10^{-4}$          | S10       |
| In1-H                                                                                                                                                | 60 °C, 98% RH          | $3.45 \times 10^{-4}$          | S11       |
| {[In(5-Hsip)2(Me2NH2)]·DMF·(H2O)1.4}n                                                                                                                | 25 °C, 40% RH          | $1.17 \times 10^{-3}$          | S12       |



## REFERENCES

- S1 M. J. Wang, X. R. Chen, Y. B. Tong, G. J. Yuan, X. M. Ren and J. L. Liu, *Inorg. Chem.*, 2017, **56**, 9525–9534.
- S2 H.-Y. Sun, S.-H. Sun, B. Hu, L.-K. Gong, Y.-M. Zou, J.-L. Li, M.-L. Feng and X.-Y. Huang, *Inorg. Chem. Front.*, 2020, **7**, 1699-1703.
- S3 H. Ōkawa, K. Otsubo, Y. Yoshida and H. Kitagawa, *Chem. Commun.*, 2020, **56**, 6138-6140.
- S4 H.-B. Luo, Q. Ren, Y. Liu, J. Zhang and X.-M. Ren, *Inorg. Chem.*, 2020, **59**, 7283-7289.
- S5 C. Liu, a N. Zhao, X. Zou and G. Zhua, *CrystEngComm*, 2018, **20**, 3158-3161.
- S6 X. Meng, a M.-J. Wei, H.-N. Wang, H.-Y. Zang, Z.-Y. Zhou, *Dalton Trans.*, 2018, **47**, 1383–1387.
- S7 Xin Wang, T. Qin, S.-S. Bao, Y.-C. Zhang, a X. Shen, L.-M. Zheng and D. Zhu, *J. Mater. Chem. A*, 2016, **4**, 16484–16489.
- S8 Y. Qin, X. Wang, W. Xie, Z. Li, and G. Li, *Inorg. Chem.* 2020, **59**, 10243–10252.
- S9 F. Yang, G. Xu, Y. B. Dou, B. Wang, H. Zhang, H. Wu, W. Zhou, J. R. Li and B. L. Chen, *Nat. Energy*, 2017, **2**, 877–883.
- S10 H. Gao, Y.-B. He, J.-J. Hou, Q.-G. Zhai, and X.-M. Zhang, *ACS Appl. Mater. Interfaces* 2020, **12**, **37**, 41605-41612.
- S11 X. Du, R. Fan, L. Qiang, Y. Song, K. Xing, W. and Chen, P. Wang and Y. Yang, *Inorg. Chem.*, 2017, **56**, 3429-3439.
- S12 B. Joarder, J.-B. Lin, Z. Romero, and G. K. H. Shimizu, *J. Am. Chem. Soc.* 2017, **139**, 7176–7179.
